# Supplementary material for: Perception and Demands of Pregnant and Breastfeeding Women Regarding Their Role as Participants in Environmental Research Studies
Source: MDPI journal article supplement (doi:10.3390/ijerph18084149), 2021-04-14
Supplement: s1 [file s1]

## Table S3: ENCUESTA NUTRICIONAL EN SITUACIÓN DE EMBARAZO

### DATOS GENERALES

Edad de la mujer: \_\_\_\_\_ años      Altura: \_\_\_\_\_ cm      Peso pre-gestacional: \_\_\_\_\_ kg

Peso actual de la mujer: \_\_\_\_\_ kg      Circunferencia del brazo: \_\_\_\_\_ cm

Nº hijos nacidos: ☐ 0      ☐ 1      ☐ 2      ☐ 3 ó más

Nivel de estudios: ☐ Sin estudios      ☐ Primarios      ☐ Bachillerato o F.P.      ☐ Titulación universitaria

¿Cómo considera que es su salud actual comparada con la de otras mujeres en su situación?

☐ Muy buena      ☐ Buena      ☐ Regular      ☐ Mala      ☐ Muy mala      ☐ NS/NC

¿Cómo considera que es su alimentación actual comparada con la de otras mujeres en su situación?

☐ Equilibrada      ☐ Bastante equilibrada      ☐ Poco equilibrada      ☐ Muy desequilibrada      ☐ NS/NC

Actividad física en un día típico (horas totales):

Horas tumbada o dormida: \_\_\_\_\_

Horas de actividades sentada: \_\_\_\_\_

Horas de actividades de pie o en movimiento: \_\_\_\_\_

### INFORMACIÓN OBSTÉTRICA

Tipo de embarazo: ☐ Único      ☐ Gemelar      ☐ Triple o más      Semana de gestación: \_\_\_\_\_ semanas (2-42)

Paridad: ☐ 1º embarazo      ☐ 2º embarazo      ☐ 3º embarazo o más      Proximidad entre embarazos: ☐ <1 año      ☐ ≥ 1 año

Abortos previos: ☐ 0      ☐ 1      ☐ >1      Antecedentes de bajo peso al nacer: ☐ Sí      ☐ No

### INFORMACIÓN DE LA LACTANCIA

Tipo de lactancia prevista (meses):

☐ Materna 0-3 m      ☐ Materna 0-6 m      ☐ Artificial 0-6 m      ☐ Mixta 0-3 m      ☐ Mixta 0-6 m

### HÁBITOS

Tabaquismo: ☐ No      ☐ Previo      ☐ Activo      ☐ Pasivo

Consumo de alcohol: ☐ No      ☐ Previo      ☐ Puntual      ☐ Frecuente

Consumo de drogas: ☐ No      ☐ Previo      ☐ Puntual      ☐ Frecuente

### ESTADO FISIOPATOLÓGICO

Diabetes gestacional actual (con diagnóstico médico confirmado): ☐ Sí      ☐ No

Enfermedades de la mujer: ☐ Problemas leves      ☐ Una enfermedad grave      ☐ Más de una enfermedad grave

Dietas especiales: ☐ Hipocalórica      ☐ Hipoglucídica      ☐ Hipolipídica      ☐ Hiposódica

☐ Vegetariana estricta      ☐ Ovoláctovegetariana      ☐ Otras      ☐ Ninguna

### HÁBITOS ALIMENTARIOS

Frecuencias de consumo: nunca (0) / mensual (1, 2 ó 3) / semana (1, 2, 3, 4, 5 ó 6) / diario (1, 2, 3, 4, 5, 6 ó más)

|                       |       |                                   |       |
|-----------------------|-------|-----------------------------------|-------|
| Lácteos:              | _____ | Frutas:                           | _____ |
| Huevos:               | _____ | Frutos secos:                     | _____ |
| Carnes:               | _____ | Legumbres:                        | _____ |
| Embutidos y fiambres: | _____ | Pan:                              | _____ |
| Pescados:             | _____ | Arroz, pasta y patatas:           | _____ |
| Ensaladas y verduras: | _____ | Bollería y repostería industrial: | _____ |

Suplementación de la dieta:

☐ Leche enriquecida en calcio/vitaminas      ☐ Fibra/Prebióticos      ☐ Probióticos      ☐ Yodo/Sal yodada

☐ Ácido fólico/Vitamina B<sub>12</sub>      ☐ Hierro      ☐ Polivitamínicos y minerales      ☐ Ninguno

Tipo de grasa más utilizada para aliñar/cocinar:

☐ Oliva virgen      ☐ Oliva      ☐ Girasol      ☐ Mantequilla      ☐ Margarina

Tipo de edulcorante más utilizado para endulzar alimentos/ bebidas:

☐ Azúcar      ☐ Miel      ☐ Fructosa      ☐ Sacarina      ☐ Ninguno
