# Supplementary material for: Perception and Demands of Pregnant and Breastfeeding Women Regarding Their Role as Participants in Environmental Research Studies
Source: MDPI journal article supplement (doi:10.3390/ijerph18084149), 2021-04-14
Supplement: s1 [file s1]

## Table S1: CONSENTIMIENTO INFORMADO DEL PARTICIPANTE

**PROYECTO: “Percepción del riesgo de contaminación por CTP a través de la alimentación en mujeres embarazadas y lactantes: Estudio MUMFOOD”**

Yo, *(nombre y apellidos)*.....,

- ☐ He leído la hoja de información que se me ha entregado.
- ☐ He sido informada de manera clara de los objetivos de la investigación y he recibido suficiente información.
- ☐ He sido informada que la reunión del grupo tendrá una duración de unos 60 minutos.
- ☐ He hablado con: *(nombre del investigador)*.....
- ☐ He podido hacer preguntas sobre el estudio y he sido informada que cualquier otra pregunta que tenga en relación con el estudio será respondida oportunamente por teléfono o correo electrónico.
- ☐ Comprendo que mi participación es voluntaria.
- ☐ Comprendo que si algún tema de conversación durante el desarrollo de la reunión del grupo me parecen incómodo, tengo el derecho de hacérselo saber al investigador o de no participar.
- ☐ Comprendo que puedo retirarme del estudio cuando quiera y sin tener que dar explicaciones.
- ☐ He sido informada que la reunión de grupo será grabada y que una vez transcrita la grabación será destruida.
- ☐ He sido informada que la información que provea en el curso de esta investigación es estrictamente confidencial y no será usada para ningún otro propósito fuera de los de este estudio sin mi consentimiento.
- ☐ He sido informada de que mis datos personales serán protegidos de acuerdo con lo dispuesto en la Ley Orgánica 15/1999 de Protección de Datos de Carácter Personal y serán utilizados únicamente con los fines especificados en la hoja de información.
- ☐ Comprendo que tengo los derechos de acceso, rectificación, cancelación y oposición a mis datos de carácter personal de acuerdo con lo dispuesto en la Ley Orgánica 15/1999 de Protección de Datos de Carácter Personal.
- ☐ He sido informada que puedo recibir información sobre los resultados del estudio cuando éste haya concluido, si así lo solicito.
- ☐ Presto libremente mi conformidad para participar en el estudio y doy mi consentimiento para el acceso y utilización de mis datos en las condiciones detalladas en la hoja de información.
- ☐ Entiendo que una copia firmada de este Consentimiento Informado me será entregada.

**Firma del participante:**

**Firma del investigador:**

Nombre:  
Fecha:

Nombre:  
Fecha:
